# Supplementary material
Source: publisher figshare collection journal article supplement (https://frontiersin.figshare.com/ndownloader/files/21301590)
Supplement: Supplementary file 1 [file 21301590]

**Supplementary material 3.** U1 snDNA coding region nucleotide variability within species (first diagonal, bold values with standard deviation); average evolutionary divergence between species (values in lower diagonal and standard) and number of fixed diferences between species (values in upper diagonal and standard).

|  | Talb | Tauri | Tgue | Tnem | Tpan | Trot | Tsig | Ttrif |
| --- | --- | --- | --- | --- | --- | --- | --- | --- |
| Talb | **0,014 ± 0,004** | 2 | 0 | 0 | 0 | 0 | 0 | 0 |
| Tauri | 0,020 ± 0,007 | **0,001 ± 0,001** | 2 | 2 | 2 | 2 | 2 | 2 |
| Tgue | 0,043 ± 0,009 | 0,049 ± 0,015 | **0,039 ± 0,006** | 1 | 1 | 1 | 1 | 1 |
| Tnem | 0,013 ± 0,005 | 0,017 ± 0,006 | 0,043 ± 0,010 | **0,010 ± 0,003** | 0 | 0 | 0 | 0 |
| Tpan | 0,009 ± 0,004 | 0,014 ± 0,006 | 0,039 ± 0,011 | 0,007 ± 0,003 | **0,003 ± 0,000** | 0 | 0 | 0 |
| Trot | 0,012 ± 0,004 | 0,017 ± 0,006 | 0,041 ± 0,009 | 0,010 ± 0,004 | 0,007 ± 0,003 | **0,009 ± 0,003** | 0 | 0 |
| Tsig | 0,014 ± 0,006 | 0,019 ± 0,007 | 0,044 ± 0,011 | 0,011 ± 0,005 | 0,008 ± 0,005 | 0,011 ± 0,005 | **0,012 ± 0,004** | 0 |
| Ttrif | 0,014 ± 0,005 | 0,019 ± 0,006 | 0,044 ± 0,009 | 0,011 ± 0,004 | 0,008 ± 0,004 | 0,011 ± 0,004 | 0,013 ± 0,005 | **0,012 ± 0,002** |
